26 The sensitivity becomes considerably low when the samples are pooled, there is a higher  
27 percentage of false negatives with higher pool size and when the patient viral load is low or  
28 weak positive samples. High variability was seen in the intra and inter assay, especially in weak  
29 positive samples and larger pool size.

## 30 Conclusion

31 As COVID - 19 numbers are still high and testing capacity needs to be high, we have to  
32 meticulously evaluate the testing strategy for each country depending on its testing capacity,  
33 infrastructure, economic strength, and need to make a serious call on cost effective strategy of  
34 resource saving and risk/ cost of missing positive patients.

35 **Key words:** COVID-19; SARS-CoV-2; diagnosis; mass screening; sample pooling;

## 36 Background

37 The world in 2020 has been witnessing the most crippling pandemic on earth, ever since its  
38 outbreak in December 2019 at Wuhan, China. It is widely known as COVID-19, caused by  
39 SARS- COV- 2 virus, it's a new virus and not much has been known about the virus. From  
40 what is known the virus seems to exhibit a variable incubation period which can be up to 14  
41 days and asymptomatic carriers can also transmit the virus, it spreads rapidly and affected large  
42 number of people than SARS and MERS, despite having lower case fatality rate. <sup>1</sup> All these  
43 characteristics of the novel virus has made the containment and control of the virus challenging.

44 The World Health Organization (WHO) has recommended robust diagnostic testing to  
45 differentiate SARS-CoV-2 from other respiratory infections to aid in guiding appropriate care  
46 and management. Since the pandemic has affected millions of people, mass testing requires a  
47 lot of resources. Further the WHO has suggested around 10 – 30 tests per Positive case as a

48 benchmark for adequate testing, it also has recommended a positive rate lower than 10% and  
49 better if lower than 3%.<sup>2</sup>

50 In situations like this sample pooling can be a vital strategy to do testing in large numbers,  
51 where sample extracts from a random number of samples from a heterogeneous population  
52 group are combined into a single tube for pooled PCR analysis and this strategy have shown to  
53 be cost-effective during mass testing compared with individual testing.<sup>3</sup>

54 When the disease prevalence is less, it can be advantageous to pool individual samples into a  
55 single pool, this increases the test capacity and reduces the number of PCR tests.<sup>4,5</sup> For  
56 COVID-19, it has been estimated that pooling strategy reduces cost by 69% and use of tenfold  
57 fewer tests.<sup>6,7</sup> Recent research have also established the optimal pool size that maintains the  
58 testing accuracy for SARS-CoV-2 PCR and has found that accuracy is retained in a pool size  
59 of up to 32 samples. It has shown that costs can be reduced substantially without sacrificing  
60 accuracy.<sup>8-10</sup>

61 However, when samples are diluted, there could be less viral genetic material available to  
62 detect and this increases in greater likelihood of false negative results. But studies establish  
63 that sample pooling will greatly increase the number of individuals that can be tested using less  
64 resource with a small reduction in sensitivity, which may be acceptable depending on the  
65 pooling efficiency<sup>11</sup> Therefore, the FDA generally recommends that pooling test shows  $\geq 85\%$   
66 percent positive agreement when compared with the same test performed on individual  
67 samples.

68 In UAE, as of November 2020, there are around 1500 COVID -19 cases per 100K population  
69 and UAE is in the top compared to other nations in the number of tests done per 100K  
70 population.<sup>12</sup> Around 149,000 tests are done per 100K population and the positive rate is 1%.

71 [Figure 1]. With this background, the study aims to evaluate the pooling strategy for mass  
72 screening of COVID-19.

### 73 **Aim**

74 The aim of the study is to evaluate the pooling method for mass screening of COVID-19.

### 75 **Objectives**

- 76 • To evaluate the sensitivity of 4 and 8 sample pooling for testing COVID -19.
- 77 • To study the repeatability and reproducibility of sample pooling by doing a inter and  
78 intra assay precision analysis

79

### 80 **Materials and method**

81 The samples for this study were collected from individuals using nasopharyngeal swabs and  
82 were transported to the viral transport medium (VTM). All methods were carried out in  
83 accordance with relevant guidelines and regulations. Then RNA extraction was done by the  
84 automated machine MGISP -960. After the RNA extraction, 10 microliters of the sample  
85 extract is added to 20 microliter of the master mix (BGI RT-PCR fluorescence KIT). Every  
86 plate has a positive control and a negative or blank control.

87 In individual sample extraction, 160 microliters of the sample were used in each well, for the  
88 pooled sample 160 microlitre in each well was constituted by 40 microlitre of each sample in  
89 4 fold pool sampling and 20 microlitre of each sample for 8 fold pool sampling.

90 Then the pooled samples are extracted following the RT- PCR procedure. VIC channel  
91 represents the B-actin housekeeping gene as internal control while FAM channel represents the  
92 ORF1ab gene for SARS-COV-2 virus detection. A positive test specimen is one for which VIC

93 must have a cycle threshold (Ct) value  $\leq 32$  and FAM Ct  $\leq 35$ , both fluorescence curves should  
94 be S shaped. A negative sample is one where there is no fluorescence curve at the FAM channel  
95 and a CT value of  $< 32$  and S shaped curve at the VIC channel.

96 If “S” shaped fluorescence curve is detected with a FAM Ct  $> 35$ , re-extraction is done and RT  
97 PCR test is repeated, if a negative result is detected, it is reported negative and if “S” curve is  
98 detected with a FAM Ct  $\leq 38$  in re extraction results, then a positive report is given.

### 99 **Sensitivity of pooled sample**

100 For the sensitivity analysis, 40 known positive samples and 280 known negative samples were  
101 taken. In the 4-fold pool sample testing 40 known positive samples and 120 known negative  
102 samples were tested and in 8-fold pool sample testing, 40 known positive samples and 280  
103 known negative samples were tested. Each well contained one known positive and 3 known  
104 negative samples in the 4pool method and each well contained one known positive and 7 known  
105 negative samples in the 8-pool sampling.

106 To analyse the sensitivity of sample of various viral load, out of the 40 samples used for pooling  
107 , ten high viral load samples [HP] with Ct  $\leq 20$ , ten medium viral load samples [MP] with Ct  $>$   
108 20 to  $< 30$  and twenty low viral load or weak positives samples [WP] with Ct  $> 30$  were used.

109 The sensitivity of the 4-pool sampling and 8 - pool sampling was determined by running the  
110 samples individually and the same samples were run in 4 and 8 pooled sample method and the  
111 ability to detect the true positives were compared.

### 112 **Precision**

113 To assess the precision of pooled sample method intra and inter assay precision study were  
114 conducted.

### 115 **Intra assay precision**

116 Intra assay precision was calculated by running 30 known positive samples in 4 pool and 8  
117 pool sampling twice. 30 known positive samples were classified into three groups of 10  
118 samples each based on the CT values as high viral load samples [HP] medium viral load  
119 samples [MP] and low viral load or weak positives samples [WP] as mentioned above.

120 All these samples were run twice, and the variability was assessed calculating the coefficient  
121 of variation (CoV %).

122

### 123 **Inter assay precision**

124 Inter assay precision was calculated by running 30 known positive samples, which was again  
125 classified into three groups based on the CT values as above. These samples were run on three  
126 consecutive days and the variability was assessed calculating the coefficient of variation (CoV  
127 %).

128 While doing the intra and inter assay experiment three known negative samples have been  
129 added to the same well along with one of the 30 known positive samples for 4 pool sample and  
130 seven known negative were added to the same pool along with one known positive for 8 pool  
131 sample .

### 132 **Results**

133 Our study showed that the sensitivity of 4 pooled sample was 75% and the sensitivity of 8  
134 pooled sample was 62.5% (Table 1 and table 2). The sensitivity decreases from 75% in 4 pool  
135 sampling to 62.5% in 8 pool sampling. In the low viral load, weak positive samples (Ct value  
136  $\geq 35$ ), sensitivity of 4 pool sample was 50% (Table 3) and it further reduces to 25% in 8 pool  
137 sampling with a false negative percentage as high as 75%. (Table 4)

138 The Ct difference was calculated between individual and pooled sample and the difference  
139 increased with the increase in pool size, the difference was more pronounced in the low viral  
140 load, weak positive group. (Table 5). The median Ct difference increased with increase in pool  
141 size and the maximum values were observed in weak viral load positive pooled samples. In the  
142 weak viral load positive sample pooling, the median became almost 0, as most samples turned  
143 negative with Ct value of 0 in the 8 pool of weak viral load positive sample. [Fig 2, 3,4]

144 Table 6, shows the discrepancies in results of the 40 positive samples, there were totally 15  
145 positive samples that missed detection after the samples were pooled.

146 The % CV (Coefficient of variance) ranged from 0 – 4% in intra and inter assay of 4 pool  
147 samples of high and medium viral load positive samples, however inter assay of 8 pool sample  
148 and weak positive samples of 4 pool and 8 pool both inter and intra assay were very high (Table  
149 7 and Table 8)

## 150 **Discussion**

151 Our study showed that the strategy of pooling of samples for COVID-19 RT-PCR, has lower  
152 sensitivity than the standard individual RT-PCR and the sensitivity decreases with the increase  
153 in the pool size. Further when weak viral load positive samples were pooled the sensitivity  
154 became as low as 25%, which leads to increased false negatives. Similar studies have reported  
155 varied results, some studies have claimed pooling to be an effective strategy, a study done in  
156 Malaysia showed that pools of 10 samples were similar in sensitivity compared to individual  
157 testing.<sup>14</sup> A study in UK, has strongly supported pooled approach and reports a clinically  
158 insignificant sensitivity loss when samples are pooled and false positive rate up to 5.3%.<sup>15</sup> But  
159 another study done in Spain evaluating the sensitivity of pooled samples, testing various

160 solutions and VTM showed that the sensitivity varied from 62.5 % to 81% and false negatives  
161 were as high as up to 40 % .<sup>16</sup>

162 The study also showed that the pooling resulted in a median loss of 2.29 Ct for high viral load  
163 positive 4 -pool samples to median loss of – 36.01 Ct in 8 - pool low viral load positive  
164 samples, this is because the samples became negative with Ct value 0, after 8 sample pooling.  
165 This shows that in low viral load/ weak positive pooled samples the cycle threshold increased,  
166 or most samples went undetected. A study in Kenya also showed that the cycle threshold values  
167 were higher for samples which were pooled then tested individually.<sup>17</sup> The study in Spain also  
168 showed that sample dilution in pooling strategy resulted in a median loss of 2.8 to 3.3 Ct and  
169 thereby drop in sensitivity.<sup>18</sup>

170 The coefficient of variation was high among the low viral load positive samples both in the  
171 inter and intra assay, this shows the high variability in the results when the samples are pooled.  
172 Higher Ct values in sample pooling method might be due to the inadequacy of samples when  
173 they are pooled and lower Ct values in pool testing might be due to the carrier effect of the  
174 higher RNA content in the pool. There is not much studies that have commented on %CV  
175 variability pertaining to COVID-19 testing.<sup>19</sup>

176 When a person shows a weak positive result, that means that the viral load is low, so we need  
177 to amplify it several more times to detect the virus, hence the high Ct value. This kind of weak  
178 positives may be a of result of sample inadequacy or the person is in early/ late stage of  
179 infection where the viral load is low. These samples are missed detection when they are pooled.  
180 Such weak positive samples may pose a significant threat of spreading the infection to others.  
181 Studies on the clinical significance of low viral load positive cases are needed, and it remains  
182 a question of whether it is safe to miss detection of such cases?



183 Pooling samples can be very challenging logistically, usually in pool testing if a pooled sample  
184 tests negative, then all samples within that pool are deemed negative and if a pool tests positive,  
185 then individual samples making up that pool are tested again as individual samples to identify  
186 the positives. Hence the larger the pool the more challenging is the deconvolution.<sup>20</sup> Further  
187 there is additional time required in deconvoluting larger pools, which leads to time delay in  
188 reporting and this becomes crucial in severely ill patients and the high-risk contacts where early  
189 reporting is requisite.<sup>21</sup> Not to neglect the anxiety caused by isolation in patients included in  
190 the positive sample pools, until retesting of the individual samples is completed.

191 A lot of factors affect the sensitivity of RT-PCR, like the sensitivity of the kit, dilution used,  
192 the techniques of sample collection, type of samples (NPS vs oropharyngeal vs nasal etc),  
193 sample transport temperature, viral load in the sample which varies according to the stage of  
194 infection.<sup>22,23</sup> Therefore RT-PCR of sample pooling strategy has its own limitations, it cannot  
195 ensure the diagnostic integrity of the individual sample,<sup>24</sup> it can mask the technical errors like  
196 insufficient sampling,<sup>19,25</sup> it has higher percentage of false negatives,<sup>10</sup> reduces sensitivity<sup>26</sup>  
197 and sample dilution has led to the risk of missing weak viral load or borderline positive  
198 samples<sup>17,21</sup> Although pooling of samples facilitates rational use of resources, it might miss  
199 individuals who might be positive for COVID-19.<sup>27,28</sup>

200 This information becomes crucial for deciding the pooled strategy testing for disease like  
201 COVID -19. In the current pandemic, we simply can't afford to miss any positive cases. With  
202 the high  $R_0$  value around 3 for SARS-COV-2,<sup>29</sup> every missed positive case can lead to rapid  
203 spread of infection to others.

## 204 **Limitations**

205 Our study was conducted in a single laboratory in a defined geographical area, more studies  
206 and data are needed to validate sample pooling strategies and the clinical significance and threat  
207 of communicability of weak positive samples.

## 208 **Conclusion**

209 Based on the study results, we conclude that pooled testing strategy misses low viral load/ weak  
210 positive COVID – 19 cases and there is high variability in results when the samples are pooled.  
211 While in a low resource setting, where pooled sample testing is better than not having any kind  
212 of testing, sample pooling might be an effective way for mass screening and the increase in  
213 percentage of false negative tests may be dismissed, but caution is advised and it needs careful  
214 scrutiny. In the current scenario of the pandemic, validation studies on the cost-effective  
215 analysis of pooling samples should be done, considering the cost and risk of missing even a  
216 single positive person. As COVID - 19 numbers are still high and testing capacity needs to be  
217 high, we have to meticulously evaluate the testing strategy of each country depending on its  
218 testing capacity, infrastructure, economic strength, and need to make a serious call on cost  
219 effective strategy of resource saving and cost of missing positive patients.

## 220 **Declarations**

### 221 **Ethics approval and consent to participate**

222 The Ethics approval was obtained from Department of Health (DOH) Institutional review  
223 board (IRB), Abu Dhabi

224 All methods were carried out in accordance with relevant guidelines and regulations. The  
225 Department Of Health (DOH) Institutional review board (IRB), Abu Dhabi

226 has waived off the consent as it does not use any participant data/ information, the lab data on  
227 the viral samples were only used for this study

228 Consent for publication – Not applicable

229 **Data Availability**

230 The data is available with the corresponding author, Dr. Sally, Director of Biogenix G42 lab  
231 and will be produced on request

232 **Competing interests**

233 The authors declare that they have no competing interests regarding the publication of this  
234 paper

235 **Funding statement**

236 The study was not funded by any funding body, it was done in Biogenix lab as a part of research

237 **Authors' contribution**

238 SM – conception, design of work, acquisition, analysis, interpretation of data, drafted and  
239 substantively revised the manuscript

240 EI – conception, design of work, acquisition, analysis, interpretation of data, drafted and  
241 substantively revised the manuscript

242 BT- conception, design of work, interpretation of data, drafted and substantively revised the  
243 manuscript

244 JT- conception, design of work, interpretation of data, drafted and substantively revised the  
245 manuscript

246 PR- conception, design of work, drafted and substantively revised the manuscript

247 SG-Acquisition, analysis, interpretation of data, drafted and substantively revised the

248 manuscript

249 WA- conception, drafted and substantively revised the manuscript

## 250 **Acknowledgments**

251 We acknowledge all lab personnel, skilled technicians who provided help during the research

252 and preparation of the manuscript

## 253 **References**

254 1. Mahase Elisabeth. Coronavirus: covid-19 has killed more people than SARS and

255 MERS combined, despite lower case fatality rate BMJ 2020; 358 :m461

256 2. WHO. COVID-19 - virtual press conference - 30 March 2020. Available at:

257 [https://www.who.int/docs/default-source/coronaviruse/transcripts/who-audio-](https://www.who.int/docs/default-source/coronaviruse/transcripts/who-audio-emergencies-coronavirus-press-conference-full-30mar2020.pdf?sfvrsn=6b68bc4a_2)

258 [emergencies-coronavirus-press-conference-full-30mar2020.pdf?sfvrsn=6b68bc4a\\_2](https://www.who.int/docs/default-source/coronaviruse/transcripts/who-audio-emergencies-coronavirus-press-conference-full-30mar2020.pdf?sfvrsn=6b68bc4a_2)

259 3. Deckert, Barnighausen, NA Kyei. Simulation of pool sampling analysis strategy for

260 COVID – 19 mass testing. Bulletin of the World Health Organization 2020;98:590-598.

261 Available at: <https://www.who.int/bulletin/volumes/98/9/20-257188/en/>

262 4. Hogan CA, Sahoo MK, Pinsky BA. Sample pooling as a strategy to detect community

263 transmission of SARS-CoV-2. JAMA. 2020. <https://doi.org/10.1001/jama.2020.5445>.

264 5. Cherif A, Grobe N, Wang X, Kotanko P. Simulation of Pool Testing to Identify Patients

265 With Coronavirus Disease 2019 Under Conditions of Limited Test Availability. JAMA

266 Network Open. 2020;3(6):e2013075.

- 267 6. Abdalhamid B, Bilder CR, McCutchen EL, Hinrichs SH, Koepsell SA, Iwen PC.  
268 Assessment of specimen pooling to conserve SARS CoV-2 testing resources. *Am J Clin*  
269 *Pathol.* 2020;153(6):715–8.
- 270 7. Verdun CM, Fuchs T, Harar P, Elbrächter D, Fischer DS, Berner J, Grohs P, Theis FJ,  
271 Krahmer F. Group testing for SARS-CoV-2 allows for up to 10-fold efficiency increase  
272 across realistic scenarios and testing strategies. *medRxiv.* 2020
- 
- 273 8. Ben-Ami R, Klochendler A, Seidel M, Sido T, Gurel-Gurevich O, Yassour M, et al.  
274 Large-scale implementation of pooled RNA-extraction and RT-PCR for SARS-  
275 CoV-2 detection [preprint]. Cold Spring Harbor: medRxiv; 2020. Available  
276 from: <https://www.medrxiv.org/content/10.1101/2020.04.17.20069062v2> [cited  
277 2020 Nov 12].
- 278 9. Schmidt M, Hoehl S, Berger A, Zeichhardt H, Hourfar K, Ciesek S, et al. FACT –  
279 Frankfurt adjusted COVID-19 testing – a novel method enables high-throughput  
280 SARS-CoV-2 screening without loss of sensitivity [preprint]. Cold Spring Harbor:  
281 medRxiv; 2020. Available  
282 from: <https://www.medrxiv.org/content/10.1101/2020.04.28.20074187v1> [cited  
283 2020 Nov 12].
- 284 10. Yelin I, Aharony N, Shaer Tamar E, Argoetti A, Messer E, Berenbaum D, et al.  
285 Evaluation of COVID-19 RT-qPCR test in multi-sample pools. *Clin Infect Dis.* 2020  
286 May 2;ciaa531. <http://dx.doi.org/10.1093/cid/ciaa531> pmid: [32358960](https://pubmed.ncbi.nlm.nih.gov/32358960/)
- 287 11. FDA. USA. Pooled sample testing and screening testing for COVID-19. Available at:  
288 [https://www.fda.gov/medical-devices/coronavirus-covid-19-and-medical-](https://www.fda.gov/medical-devices/coronavirus-covid-19-and-medical-devices/pooled-sample-testing-and-screening-testing-covid-19)  
289 [devices/pooled-sample-testing-and-screening-testing-covid-19](https://www.fda.gov/medical-devices/coronavirus-covid-19-and-medical-devices/pooled-sample-testing-and-screening-testing-covid-19)

- 290 12. Federal Competitiveness and Statistics centre. FCSA. UAE Ministry of Cabinet Affairs.  
291 Available at: <https://fcsa.gov.ae/en-us/Pages/Covid19/UAE-Covid-19-Updates.aspx>
- 292 13. Our World in Data. United Arab Emirates. Coronavirus pandemic country profile.  
293 Available at: [https://ourworldindata.org/coronavirus/country/united-arab-](https://ourworldindata.org/coronavirus/country/united-arab-emirates?country=~ARE)  
294 [emirates?country=~ARE](https://ourworldindata.org/coronavirus/country/united-arab-emirates?country=~ARE)
- 295 14. Lim KL, Johari NA, Wong ST, Khaw LT, Tan BK, Chan KK, Wong SF, Chan WL,  
296 Ramzi NH, Lim PK, Hakim SL. A novel strategy for community screening of SARS-  
297 CoV-2 (COVID-19): Sample pooling method. PloS one. 2020 Aug 28;15(8):e0238417.
- 298 15. Iacobucci G. Covid-19: Study findings strongly support use of pooled testing, say  
299 researchers. BMJ 2020;371:m4267
- 300 16. Alcoba-Florez J, Gil-Campesino H, de Artola DG, González-Montelongo R,  
301 Valenzuela-Fernández A, Ciuffreda L, Flores C. Sensitivity of different RT-qPCR  
302 solutions for SARS-CoV-2 detection. International Journal of Infectious Diseases. 2020  
303 Oct 1;99:190-2.
- 304 17. Agoti, Charles & Mutunga, Martin & Lambisia, Arnold & Kimani, Domtila &  
305 Cheruiyot, Robinson & Kiyuka, et al. Pooled testing conserves SARS-CoV-2  
306 laboratory resources and improves test turn-around time: experience on the Kenyan  
307 Coast. Wellcome Open Research. 5. 186. 10.12688/wellcomeopenres.16113.1.
- 308 18. de Salazar A, Aguilera A, Trastoy R, et al. Sample pooling for SARS-CoV-2 RT-PCR  
309 screening [published online ahead of print, 2020 Sep 10]. *Clin Microbiol Infect.*  
310 2020;S1198-743X(20)30537-1.
- 311 19. Lohse S, Pfuhl T, Berkó-Göttel B, Rissland J, Geißler T, Gärtner B, Becker SL,  
312 Schneitler S, Smola S. Pooling of samples for testing for SARS-CoV-2 in asymptomatic  
313 people. The Lancet Infectious Diseases. 2020 Apr 28.

- 314 20. Ball J, McNally A. Pooled testing for SARS-CoV-2 could provide the solution to UK's  
315 testing strategy. *bmj*. 2020 Nov 9;371:m4312
- 316 21. Mishra B, Behera B, Mohanty M, Ravindra A, Ranjan J. Challenges and issues of  
317 SARS-CoV-2 pool testing. *Lancet Infect Dis*. 2020 Nov;20(11):1233. doi:  
318 10.1016/S1473-3099(20)30463-1. Epub 2020 Jul 14. PMID: 32679083.
- 319 22. Arevalo-Rodriguez I, Buitrago-Garcia D, Simancas-Racines D, Zambrano-Achig P,  
320 del Campo R, Ciapponi A, Sued O, Martinez-Garcia L, Rutjes A, Low N, Perez-  
321 Molina JA. False-negative results of initial RT-PCR assays for COVID-19: a  
322 systematic review. *medRxiv*. 2020 Jan 1.
- 323 23. Afzal A. Molecular diagnostic technologies for COVID-19: Limitations and  
324 challenges. *J Adv Res*. 2020 Nov;26:149-159. doi: 10.1016/j.jare.2020.08.002. Epub  
325 2020 Aug 6. PMID: 32837738; PMCID: PMC7406419.
- 326 24. CDC. Interim Guidance for Use of Pooling Procedures in SARS-CoV-2 Diagnostic,  
327 Screening, and Surveillance Testing. Available at :  
328 <https://www.cdc.gov/coronavirus/2019-ncov/lab/pooling-procedures.html>
- 329 25. Mishra B, Behera B, Mohanty M, Ravindra A, Ranjan J. Challenges and issues of  
330 SARS-CoV-2 pool testing. *The Lancet Infectious Diseases*. 2020 Nov 1;20(11):1233.
- 331 26. Pikovski A, Bentele K. Pooling of coronavirus tests under unknown prevalence.  
332 *Epidemiology & Infection*. 2020;148.
- 333 27. Abdalhamid B, Bilder CR, Garrett JL, Iwen PC (2020) Cost Effectiveness of Sample  
334 Pooling to Test for SARS-CoV-2. *J Infect Dev Ctries* 14:1136-1137. doi:  
335 10.3855/jidc.13935
- 336 28. Centers for Disease Control and Prevention. *Evaluating and testing persons for*  
337 *coronavirus disease 2019 (COVID-19). Updated March 24, 2020. Accessed March 25*  
338 *2020.* <https://www.cdc.gov/coronavirus/2019-ncov/hcp/clinical-criteria.html>

339 29. D'Arienzo M, Coniglio A. Assessment of the SARS-CoV-2 basic reproduction  
340 number,  $R_0$ , based on the early phase of COVID-19 outbreak in Italy. Biosaf Health.  
341 2020 Jun;2(2):57-59. doi: 10.1016/j.bsheal.2020.03.004. Epub 2020 Apr 2. PMID:  
342 32835209; PMCID: PMC7148916.

343

344

345 **Table 1: Sensitivity of 4 sample pooling**

| Pooling method | Standard method (Individual sample run) |          |       |
|----------------|-----------------------------------------|----------|-------|
|                | Positive                                | Negative | Total |
| Positive       | 30                                      | 0        | 30    |
| Negative       | 10                                      | 0        | 10    |
| Total          | 40                                      |          | 40    |

346 Sensitivity– 75% (CI - 61.7% - 88.3%)

347 False negative percentage – 25%

348 **Table 2: Sensitivity of 8 sample pooling**

| Pooling method | Standard method |          |       |
|----------------|-----------------|----------|-------|
|                | Positive        | Negative | Total |
| Positive       | 25              | 0        | 27    |
| Negative       | 15              | 0        | 13    |
| Total          | 40              |          | 40    |



349 Sensitivity – 62.5% (CI – 47.5% - 77.5%)

350 False negative percentage – 37.5%

351 **Table 3: Sensitivity of 4 sample pooling of 20 weak positive samples with Ct value more**  
352 **than 35**

| Pooling method | Standard method |          |       |
|----------------|-----------------|----------|-------|
|                | Positive        | Negative | Total |
| Positive       | 10              | 0        | 30    |
| Negative       | 10              | 0        | 10    |
| Total          | 20              |          | 40    |

353

354 Sensitivity– 50 % (CI – 28.09 % - 71.91%)

355 False negative percentage – 50%

356 **Table 4 : Sensitivity of 8 sample pooling of 20 weak positive samples with Ct value more**  
357 **than 35**

| Pooling method | Standard method |          |       |
|----------------|-----------------|----------|-------|
|                | Positive        | Negative | Total |
| Positive       | 5               | 0        | 5     |
| Negative       | 15              | 0        | 15    |

|       |    |  |    |
|-------|----|--|----|
| Total | 20 |  | 20 |
|-------|----|--|----|

358

359 Sensitivity – 25 % ( CI – 6.03 % - 43.97%)

360 False negative percentage – 75%

361 **Table : 5 Median Ct difference between individual and pooled samples**

| Pool details | Ct difference (Median) | Interquartile range (IQR) |
|--------------|------------------------|---------------------------|
| 4 pool (HP)  | 2.29                   | 0.49                      |
| 4 pool (MP)  | 1.79                   | 0.79                      |
| 4 pool (WP)  | - 18.26                | 39.60                     |
| 8 pool (HP)  | 3.10                   | 1.38                      |
| 8 pool (MP)  | 2.66                   | 1.21                      |
| 8 pool (WP)  | -36.01                 | 28.81                     |

362

363 \* HP – High viral load positive sample, MP- Medium viral load positive sample, WP- low  
364 viral load/ weak positive sample

365 **Table 6: Test result discrepancies in pool sample testing**

| Samples                                      | Original | 4 pool testing | 8 pool testing |
|----------------------------------------------|----------|----------------|----------------|
| <b>High viral load positive samples (HP)</b> |          |                |                |
| 1                                            | Positive | Positive       | Positive       |
| 2                                            | Positive | Positive       | Positive       |
| 3                                            | Positive | Positive       | Positive       |

|                                                    |          |          |          |
|----------------------------------------------------|----------|----------|----------|
| 4                                                  | Positive | Positive | Positive |
| 5                                                  | Positive | Positive | Positive |
| 6                                                  | Positive | Positive | Positive |
| 7                                                  | Positive | Positive | Positive |
| 8                                                  | Positive | Positive | Positive |
| 9                                                  | Positive | Positive | Positive |
| 10                                                 | Positive | Positive | Positive |
| <b>Medium viral load positive sample (MP)</b>      |          |          |          |
| 11                                                 | Positive | Positive | Positive |
| 12                                                 | Positive | Positive | Positive |
| 13                                                 | Positive | Positive | Positive |
| 14                                                 | Positive | Positive | Positive |
| 15                                                 | Positive | Positive | Positive |
| 16                                                 | Positive | Positive | Positive |
| 17                                                 | Positive | Positive | Positive |
| 18                                                 | Positive | Positive | Positive |
| 19                                                 | Positive | Positive | Positive |
| 20                                                 | Positive | Positive | Positive |
| <b>Low viral load// weak positive samples (WP)</b> |          |          |          |
| 21                                                 | Positive | Negative | Negative |
| 22                                                 | Positive | Positive | Positive |
| 23                                                 | Positive | Positive | Positive |
| 24                                                 | Positive | Positive | Positive |
| 25                                                 | Positive | Negative | Negative |

|    |          |          |          |
|----|----------|----------|----------|
| 26 | Positive | Negative | Negative |
| 27 | Positive | Negative | Negative |
| 28 | Positive | Positive | Negative |
| 29 | Positive | Negative | Negative |
| 30 | Positive | Positive | Negative |
| 31 | Positive | Negative | Negative |
| 32 | Positive | Negative | Negative |
| 33 | Positive | Positive | Positive |
| 34 | Positive | Negative | Negative |
| 35 | Positive | Positive | Positive |
| 36 | Positive | Negative | Negative |
| 37 | Positive | Positive | Negative |
| 38 | Positive | Positive | Negative |
| 39 | Positive | Positive | Negative |
| 40 | Positive | Negative | Negative |

366

367 **Table 7: Intra and inter assay of 4 pooled sampling**

|                                    | Coefficient of Variation % |
|------------------------------------|----------------------------|
| <b>Intra assay</b>                 |                            |
| High viral load positive samples   | 0 – 2 %                    |
| Medium viral load positive samples | 0 - 2%                     |
| Low viral load/ Weak positives     | 2 - 141 %                  |
| <b>Inter assay</b>                 |                            |

|                                    |         |
|------------------------------------|---------|
| High viral load positive samples   | 1 – 2 % |
| Medium viral load positive samples | 1- 4 %  |
| Low viral load/ Weak positives     | 1- 173% |

368

369 **Table 8 : Intra and inter assay of 8 pooled sampling**

|                                    | <b>Coefficient of Variation %</b> |
|------------------------------------|-----------------------------------|
| <b>Intra assay</b>                 |                                   |
| High viral load positive samples   | 0 - 4%                            |
| Medium viral load positive samples | 0 – 3%                            |
| Low viral load/ Weak positives     | 2- 141%                           |
| <b>Inter assay</b>                 |                                   |
| High viral load positive samples   | 2 – 14%                           |
| Medium viral load positive samples | 2 – 87 %                          |
| Low viral load/ Weak positives     | 26-173%                           |

370 **Fig 1: Shows the number of COVID – 19 tests done per 1000 people <sup>13</sup>**

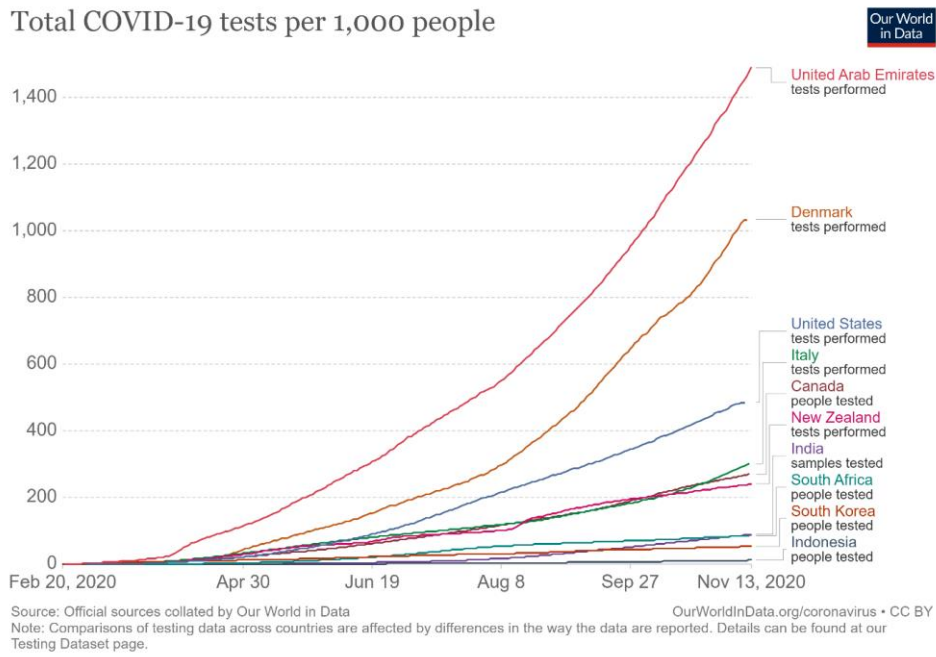

371

372

373 **Figure 2: The Ct values of High viral load positive (HP) samples**

374

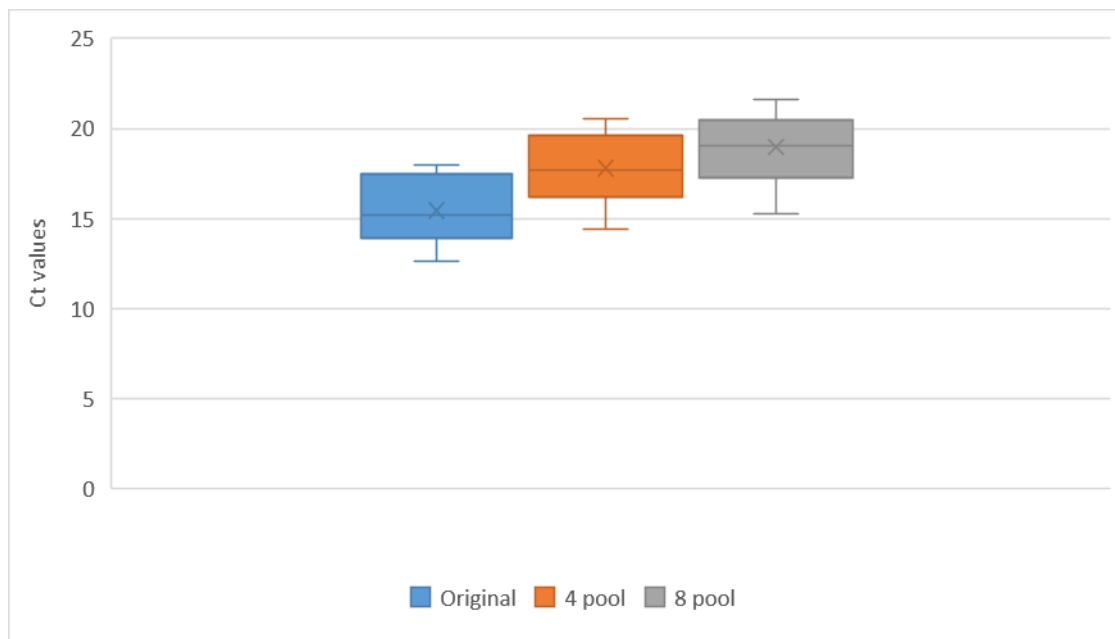

375

376

377

378 **Figure 3 : The Ct values of Medium viral load positive(MP) samples**

379

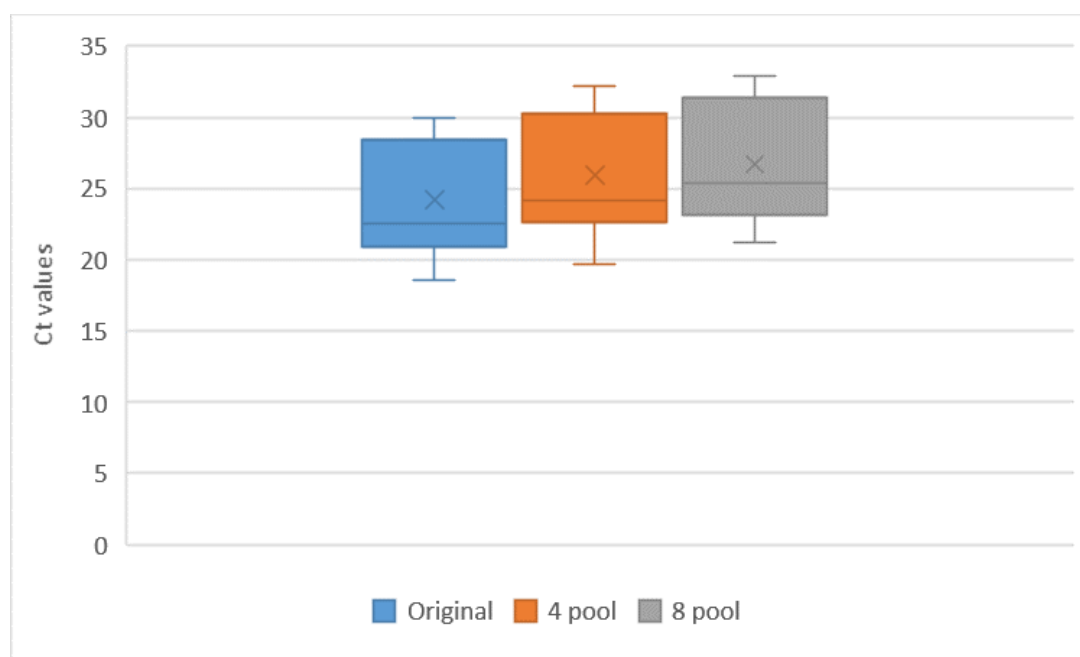

380

381

382 **Figure 4: The Ct values of low viral load / weak positive (WP) samples**

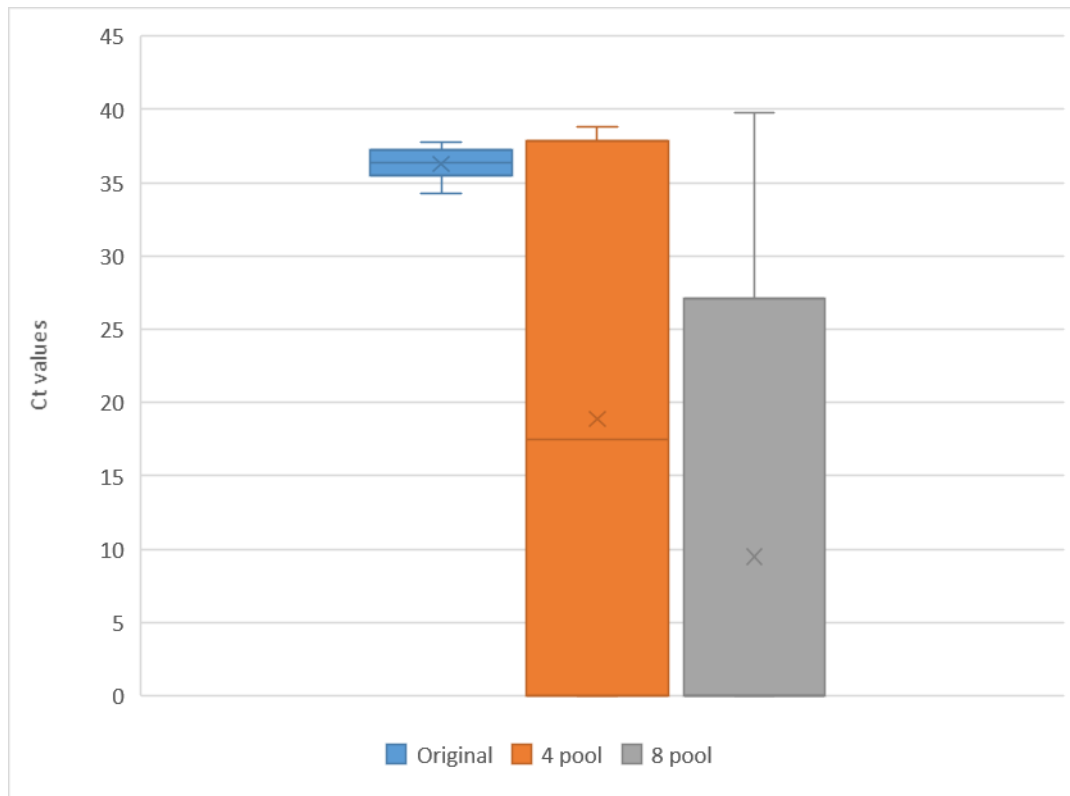

383

384

385
